# Supplementary material for: Mortality Trends Among People With Type 1 and Type 2 Diabetes in Australia: 1997–2010
Source: Oxford University Press journal article supplement (doi:10.2337/dc14-0096), 2014-06-20
Supplement: dc140096supplementarydata.pdf [file dc140096supplementarydata.pdf]

SUPPLEMENTARY DATA

**Supplementary Table 1.** All-cause SMRs in men and women with type 1 and type 2 diabetes compared to the general population; comparing the two different definitions of diabetes

| year | sex   | Type 1 diabetes        |             |                         |             | Type 2 diabetes        |             |                         |             |
|------|-------|------------------------|-------------|-------------------------|-------------|------------------------|-------------|-------------------------|-------------|
|      |       | Correct DM definition* |             | Incorrect DM definition |             | Correct DM definition* |             | Incorrect DM definition |             |
|      |       | SMR                    | 95% CI      | SMR                     | 95% CI      | SMR                    | 95% CI      | SMR                     | 95% CI      |
| 1997 | Men   | 4.20                   | (3.66-4.82) | 4.56                    | (3.97-5.24) | 1.40                   | (1.36-1.44) | 1.40                    | (1.36-1.44) |
| 1998 | Men   | 3.43                   | (2.97-3.96) | 3.74                    | (3.22-4.34) | 1.38                   | (1.34-1.42) | 1.35                    | (1.31-1.38) |
| 1999 | Men   | 3.94                   | (3.47-4.48) | 3.97                    | (3.45-4.57) | 1.37                   | (1.34-1.41) | 1.34                    | (1.30-1.37) |
| 2000 | Men   | 3.48                   | (3.05-3.97) | 3.26                    | (2.80-3.80) | 1.37                   | (1.33-1.40) | 1.33                    | (1.30-1.37) |
| 2001 | Men   | 3.98                   | (3.53-4.49) | 4.08                    | (3.57-4.67) | 1.33                   | (1.30-1.36) | 1.29                    | (1.26-1.33) |
| 2002 | Men   | 3.57                   | (3.16-4.04) | 3.70                    | (3.23-4.25) | 1.28                   | (1.26-1.31) | 1.25                    | (1.22-1.28) |
| 2003 | Men   | 3.48                   | (3.09-3.92) | 3.18                    | (2.76-3.67) | 1.28                   | (1.25-1.31) | 1.26                    | (1.23-1.28) |
| 2004 | Men   | 3.42                   | (3.04-3.86) | 3.38                    | (2.95-3.88) | 1.27                   | (1.25-1.30) | 1.25                    | (1.23-1.28) |
| 2005 | Men   | 3.58                   | (3.20-4.01) | 3.40                    | (2.98-3.88) | 1.29                   | (1.26-1.31) | 1.27                    | (1.25-1.30) |
| 2006 | Men   | 3.46                   | (3.09-3.87) | 3.34                    | (2.93-3.80) | 1.26                   | (1.23-1.28) | 1.24                    | (1.22-1.27) |
| 2007 | Men   | 3.18                   | (2.84-3.57) | 2.96                    | (2.59-3.38) | 1.25                   | (1.23-1.27) | 1.24                    | (1.21-1.26) |
| 2008 | Men   | 3.42                   | (3.08-3.81) | 3.39                    | (3.01-3.83) | 1.22                   | (1.20-1.24) | 1.21                    | (1.19-1.23) |
| 2009 | Men   | 3.02                   | (2.71-3.37) | 2.93                    | (2.58-3.33) | 1.25                   | (1.23-1.27) | 1.24                    | (1.22-1.26) |
| 2010 | Men   | 3.08                   | (2.77-3.42) | 2.95                    | (2.61-3.33) | 1.21                   | (1.19-1.23) | 1.20                    | (1.18-1.22) |
| 1997 | Women | 3.92                   | (3.19-4.82) | 4.12                    | (3.33-5.10) | 1.56                   | (1.51-1.61) | 1.55                    | (1.50-1.61) |
| 1998 | Women | 5.39                   | (4.57-6.36) | 5.81                    | (4.88-6.91) | 1.50                   | (1.45-1.55) | 1.47                    | (1.42-1.51) |
| 1999 | Women | 4.28                   | (3.59-5.10) | 4.22                    | (3.46-5.14) | 1.48                   | (1.43-1.52) | 1.44                    | (1.40-1.49) |
| 2000 | Women | 4.40                   | (3.73-5.19) | 4.75                    | (3.96-5.69) | 1.45                   | (1.41-1.49) | 1.42                    | (1.38-1.46) |
| 2001 | Women | 4.06                   | (3.44-4.80) | 4.07                    | (3.36-4.93) | 1.42                   | (1.38-1.46) | 1.39                    | (1.35-1.43) |
| 2002 | Women | 4.32                   | (3.70-5.04) | 4.42                    | (3.70-5.27) | 1.33                   | (1.29-1.36) | 1.29                    | (1.26-1.33) |
| 2003 | Women | 4.42                   | (3.81-5.14) | 4.56                    | (3.84-5.40) | 1.35                   | (1.32-1.38) | 1.33                    | (1.29-1.36) |
| 2004 | Women | 4.52                   | (3.91-5.23) | 4.81                    | (4.09-5.65) | 1.33                   | (1.30-1.36) | 1.31                    | (1.27-1.34) |
| 2005 | Women | 3.94                   | (3.38-4.59) | 3.79                    | (3.17-4.53) | 1.30                   | (1.27-1.33) | 1.28                    | (1.25-1.31) |
| 2006 | Women | 4.10                   | (3.52-4.71) | 4.00                    | (3.39-4.73) | 1.31                   | (1.28-1.33) | 1.29                    | (1.26-1.32) |
| 2007 | Women | 3.86                   | (3.35-4.46) | 3.66                    | (3.10-4.32) | 1.27                   | (1.24-1.29) | 1.26                    | (1.23-1.28) |
| 2008 | Women | 4.13                   | (3.61-4.73) | 4.10                    | (3.52-4.78) | 1.25                   | (1.22-1.27) | 1.23                    | (1.21-1.26) |
| 2009 | Women | 4.10                   | (3.60-4.67) | 4.01                    | (3.46-4.66) | 1.24                   | (1.21-1.26) | 1.23                    | (1.20-1.25) |
| 2010 | Women | 3.46                   | (3.01-3.97) | 3.44                    | (2.94-4.02) | 1.22                   | (1.19-1.24) | 1.21                    | (1.18-1.23) |

\*These are the results as presented in the current published paper.

SUPPLEMENTARY DATA

**Supplementary Table 2.** CVD-, diabetes-, and cancer-related mortality in men and women with type 1 and type 2 diabetes, by year; comparing the two different definitions of diabetes

| Year | Mortality outcome | Type 1 diabetes        |                         |                         |                         | Type 2 diabetes        |                         |                         |                         |
|------|-------------------|------------------------|-------------------------|-------------------------|-------------------------|------------------------|-------------------------|-------------------------|-------------------------|
|      |                   | Men (% of all deaths)  |                         | Women (% of all deaths) |                         | Men (% of all deaths)  |                         | Women (% of all deaths) |                         |
|      |                   | Correct DM definition* | Incorrect DM definition | Correct DM definition*  | Incorrect DM definition | Correct DM definition* | Incorrect DM definition | Correct DM definition*  | Incorrect DM definition |
| 1997 | <b>CVD</b>        | 25.25                  | 24.75                   | 14.61                   | 14.29                   | 33.84                  | 33.91                   | 33.74                   | 34.11                   |
| 1998 |                   | 23.24                  | 22.22                   | 21.43                   | 21.26                   | 32.72                  | 33.23                   | 34.33                   | 34.75                   |
| 1999 |                   | 24.46                  | 23.44                   | 20.97                   | 19.59                   | 33.28                  | 33.73                   | 32.04                   | 32.27                   |
| 2000 |                   | 23.15                  | 20.75                   | 23.19                   | 21.55                   | 31.71                  | 32.07                   | 32.17                   | 32.16                   |
| 2001 |                   | 23.22                  | 23.11                   | 24.82                   | 20.75                   | 30.47                  | 30.43                   | 33.1                    | 33.24                   |
| 2002 |                   | 21.74                  | 20.6                    | 21.94                   | 17.5                    | 29.44                  | 29.55                   | 29.98                   | 30.06                   |
| 2003 |                   | 22.9                   | 23.5                    | 20.24                   | 18.94                   | 28.76                  | 28.74                   | 28.92                   | 28.84                   |
| 2004 |                   | 22.06                  | 20.49                   | 19.44                   | 19.73                   | 27.74                  | 27.76                   | 28.54                   | 28.13                   |
| 2005 |                   | 23.57                  | 25.00                   | 21.74                   | 18.64                   | 26.63                  | 26.7                    | 26.61                   | 26.61                   |
| 2006 |                   | 18.38                  | 16.79                   | 12.23                   | 10.00                   | 24.62                  | 24.64                   | 24.05                   | 24.08                   |
| 2007 |                   | 18.54                  | 18.75                   | 16.55                   | 16.83                   | 23.5                   | 23.43                   | 23.47                   | 23.53                   |
| 2008 |                   | 21.55                  | 21.71                   | 15.72                   | 14.63                   | 23.16                  | 23.06                   | 23.93                   | 23.93                   |
| 2009 |                   | 25.74                  | 25.71                   | 20.61                   | 19.67                   | 22.62                  | 22.54                   | 23.25                   | 23.21                   |
| 2010 |                   | 17.07                  | 16.67                   | 9.93                    | 11.11                   | 21.11                  | 21.04                   | 22.79                   | 22.68                   |
| 1997 | <b>Diabetes</b>   | 33.17                  | 33.84                   | 41.57                   | 42.86                   | 16.56                  | 16.68                   | 20.46                   | 20.5                    |
| 1998 |                   | 31.35                  | 32.75                   | 34.29                   | 35.43                   | 15.19                  | 15.56                   | 18.56                   | 18.67                   |
| 1999 |                   | 24.03                  | 25.52                   | 25.00                   | 27.84                   | 15.49                  | 15.44                   | 18                      | 18.02                   |
| 2000 |                   | 33.80                  | 38.36                   | 28.99                   | 32.76                   | 15.22                  | 15.24                   | 16.92                   | 17.05                   |
| 2001 |                   | 30.71                  | 33.02                   | 34.31                   | 36.79                   | 14.98                  | 14.81                   | 16.01                   | 15.94                   |
| 2002 |                   | 31.23                  | 32.16                   | 24.52                   | 26.67                   | 14.31                  | 14.2                    | 15.52                   | 15.29                   |
| 2003 |                   | 32.06                  | 34.97                   | 26.79                   | 30.3                    | 14.76                  | 14.59                   | 15.8                    | 15.36                   |
| 2004 |                   | 29.04                  | 33.66                   | 32.78                   | 33.33                   | 14.35                  | 14.06                   | 16.28                   | 16.11                   |
| 2005 |                   | 28.96                  | 28.7                    | 26.09                   | 28.81                   | 13.21                  | 12.86                   | 16.5                    | 16.15                   |
| 2006 |                   | 25.41                  | 27.48                   | 31.65                   | 35.00                   | 13.57                  | 13.35                   | 15.91                   | 15.69                   |
| 2007 |                   | 28.29                  | 27.78                   | 31.65                   | 31.68                   | 13.65                  | 13.44                   | 16.24                   | 16.14                   |
| 2008 |                   | 29.31                  | 28.00                   | 26.42                   | 29.27                   | 14.28                  | 14.14                   | 15.81                   | 15.67                   |
| 2009 |                   | 35.15                  | 39.29                   | 28.48                   | 31.15                   | 13.7                   | 13.54                   | 15.94                   | 15.83                   |
| 2010 |                   | 24.88                  | 25.64                   | 33.11                   | 34.19                   | 12.26                  | 12.18                   | 14.75                   | 14.57                   |
| 1997 | <b>Cancer</b>     | 8.42                   | 8.08                    | 14.61                   | 13.10                   | 25.18                  | 24.85                   | 19.86                   | 19.29                   |
| 1998 |                   | 9.19                   | 8.77                    | 11.43                   | 10.24                   | 27.84                  | 27.02                   | 20.78                   | 19.84                   |
| 1999 |                   | 12.45                  | 11.98                   | 16.13                   | 13.40                   | 25.66                  | 25.01                   | 21.01                   | 20.73                   |
| 2000 |                   | 11.57                  | 8.81                    | 13.77                   | 11.21                   | 27.24                  | 26.89                   | 21.71                   | 21.27                   |
| 2001 |                   | 10.86                  | 9.43                    | 11.68                   | 13.21                   | 28.01                  | 28.32                   | 22.26                   | 22.48                   |
| 2002 |                   | 9.88                   | 9.55                    | 23.23                   | 24.17                   | 28.36                  | 28.44                   | 22.46                   | 22.65                   |

## SUPPLEMENTARY DATA

|      |  |       |       |       |       |       |       |       |       |
|------|--|-------|-------|-------|-------|-------|-------|-------|-------|
| 2003 |  | 10.69 | 9.84  | 15.48 | 17.42 | 28.34 | 28.37 | 24.07 | 24.44 |
| 2004 |  | 11.03 | 9.76  | 9.44  | 10.88 | 29.12 | 29.42 | 23.59 | 23.94 |
| 2005 |  | 13.13 | 12.5  | 16.15 | 15.25 | 30.22 | 30.6  | 23.52 | 23.79 |
| 2006 |  | 21.62 | 21.37 | 22.3  | 23.00 | 32.08 | 32.32 | 26.12 | 26.37 |
| 2007 |  | 21.46 | 19.44 | 23.74 | 21.78 | 32.45 | 32.56 | 25.29 | 25.52 |
| 2008 |  | 18.97 | 19.43 | 23.27 | 21.95 | 32.53 | 32.69 | 24.51 | 24.6  |
| 2009 |  | 19.31 | 15.00 | 24.85 | 24.59 | 32.94 | 33.09 | 25.78 | 25.91 |
| 2010 |  | 27.32 | 25.00 | 19.87 | 17.95 | 33.63 | 33.66 | 24.55 | 24.77 |

\*These are the results as presented in the current published paper.
